# Supplementary material for: Molecular, Pathological, Radiological, and Immune Profiling of Non-brainstem Pediatric High-Grade Glioma from the HERBY Phase II Randomized Trial
Source: PubMed Central journal article supplement (PMC5956280; doi:10.1016/j.ccell.2018.04.004), 2018-05-14
Supplement: mmc1.pdf [file mmc1.pdf]

**Supplemental Information**

**Molecular, Pathological, Radiological, and Immune  
Profiling of Non-brainstem Pediatric High-Grade  
Glioma from the HERBY Phase II Randomized Trial**

**Alan Mackay, Anna Burford, Valeria Molinari, David T.W. Jones, Elisa Izquierdo, Jurriaan Brouwer-Visser, Felice Giangaspero, Christine Haberler, Torsten Pietsch, Thomas S. Jacques, Dominique Figarella-Branger, Daniel Rodriguez, Paul S. Morgan, Pichai Raman, Angela J. Waanders, Adam C. Resnick, Maura Massimino, Maria Luisa Garrè, Helen Smith, David Capper, Stefan M. Pfister, Thomas Würdinger, Rachel Tam, Josep Garcia, Meghna Das Thakur, Gilles Vassal, Jacques Grill, Tim Jaspan, Pascale Varlet, and Chris Jones**

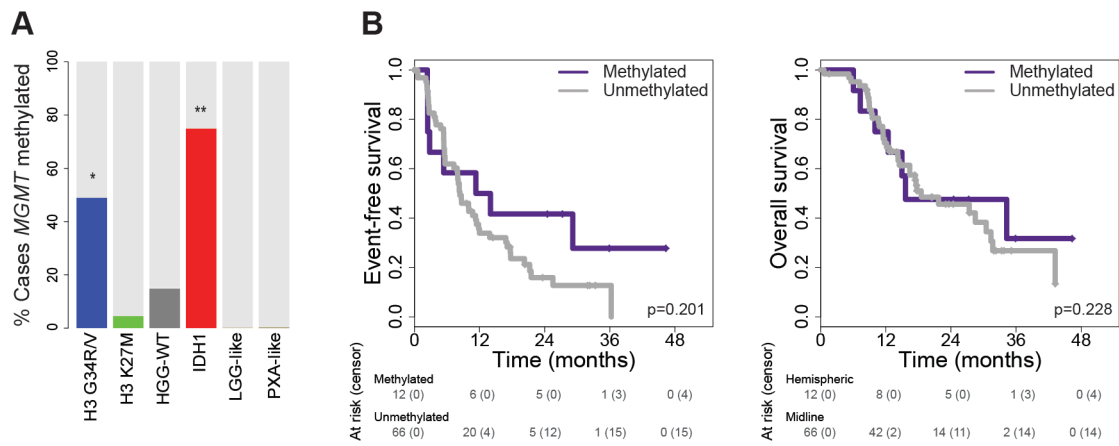

**Figure S1** (related to Figure 2) – *MGMT* promoter methylation. (A) Barplots of number of cases with methylated *MGMT* promoter, subdivided by methylation subgroup. (B) Kaplan-Meier plot of event-free and overall survival of cases (y axis) separated by *MGMT* status, time given in months (x axis) and p value calculated by the log-rank test.

**A**

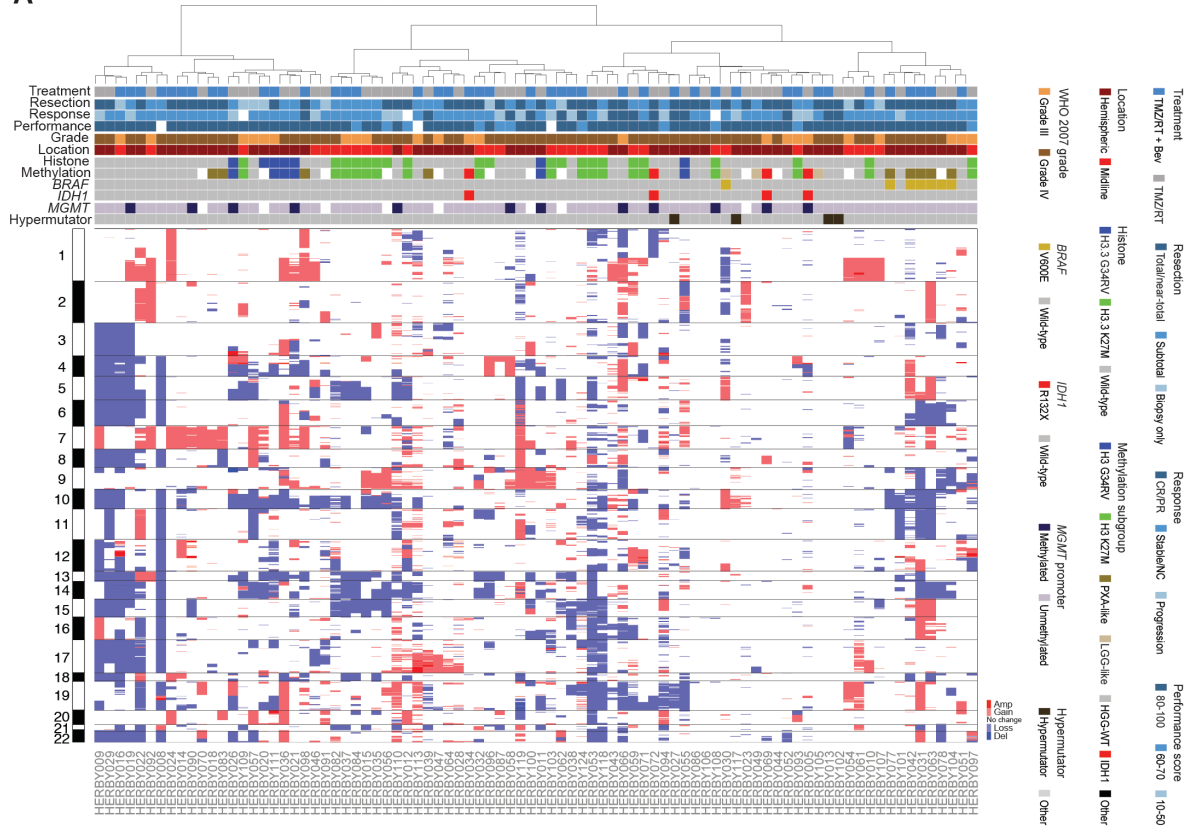

**B**

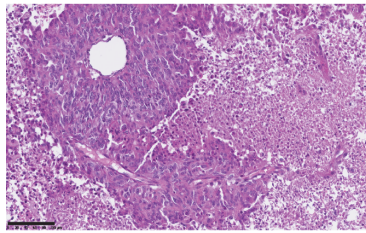

**C**

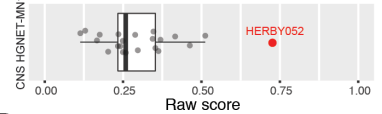

**D**

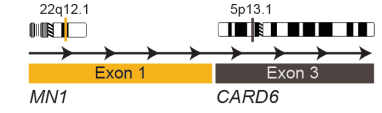

**E**

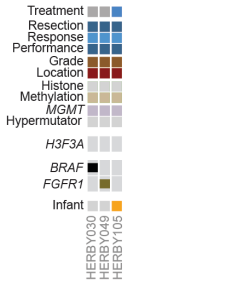

**F**

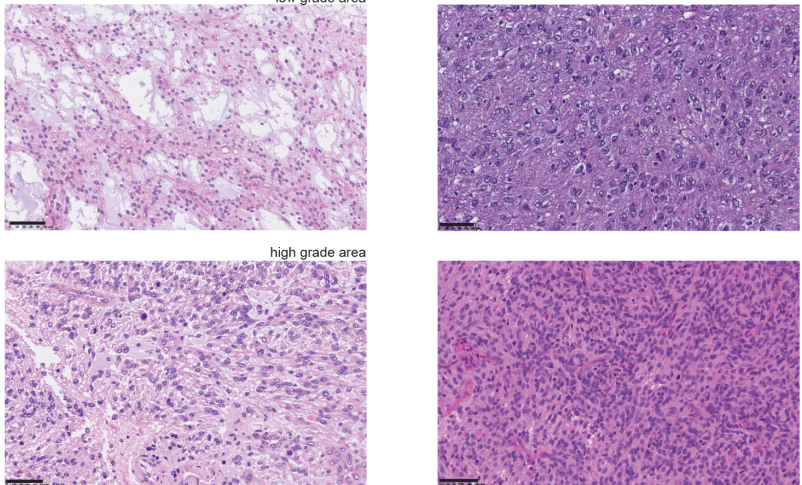

**G**

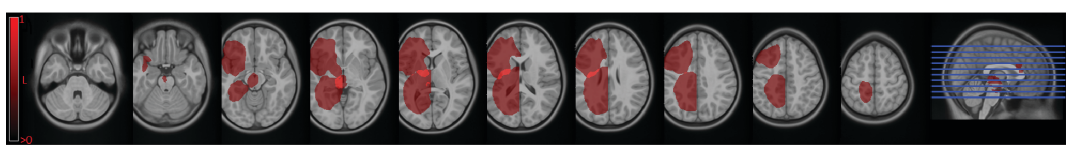

**Figure S2** (related to Figure 3) – DNA copy number profiling and non-HGG-like entities. (A) Heatmap representation of segmented DNA copy number for 86 samples derived from exome coverage data (dark red, amplification; red, gain; dark blue, deletion; blue, loss). Samples are arranged in columns clustered by gene-level data across the whole genome. Clinicopathological and molecular annotations are provided as bars according to the included key. CR/PR = complete response or partial response; Stable/NC = stable disease or no change. (B-D) CNS HGNET-MN1. Haematoxylin and eosin staining (B) of the case most closely resembling CNS HGNET-MN1 (HERBY052), as demonstrated by a boxplot of reference methylation classifier scores (C), and the presence of an *MN1:CARD6* gene fusion by capture panel sequencing (D). Scale bar = 100  $\mu$ m. (E) Integrated annotation of somatic mutations and DNA copy number changes in 3 samples classifying as LGG-like. Clinicopathological and molecular annotations are provided as bars according to the included key in Figure S1. (F) Haematoxylin and eosin staining of the three cases, all histologically classified as glioblastoma – (left) the presence of both low- (upper panel) and high grade (lower panel) areas of the tumor harboring *BRAF\_V600E* mutation (HERBY049); (top right) case harboring an intragenic *FGFR1* duplication (HERBY030; both previous cases classifying as pilocytic astrocytoma); (bottom left) a case from the infant cohort, with a methylation profile most closely resembling desmoplastic infantile ganglioglioma (HERBY105). Scale bar = 50  $\mu$ m. (G) Radiological tumor lesion map of LGG-like cases. Brighter colored pixels indicate a higher probability of tumor incidence.



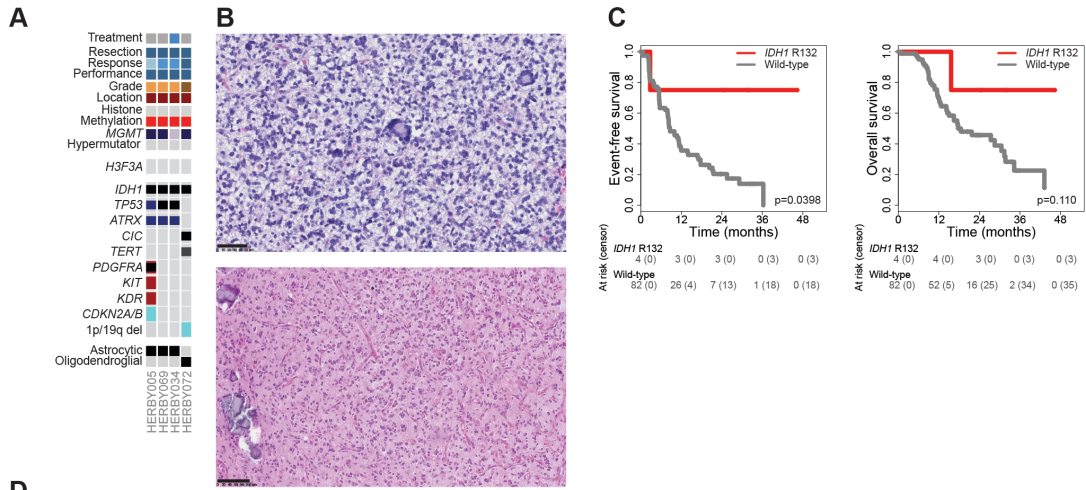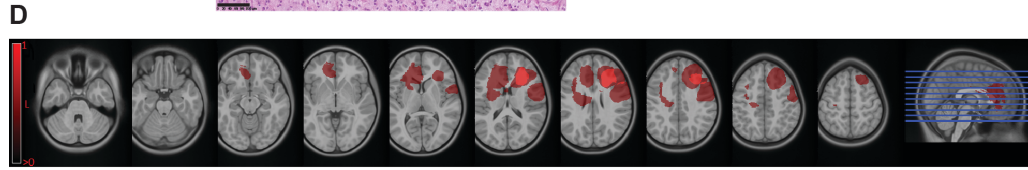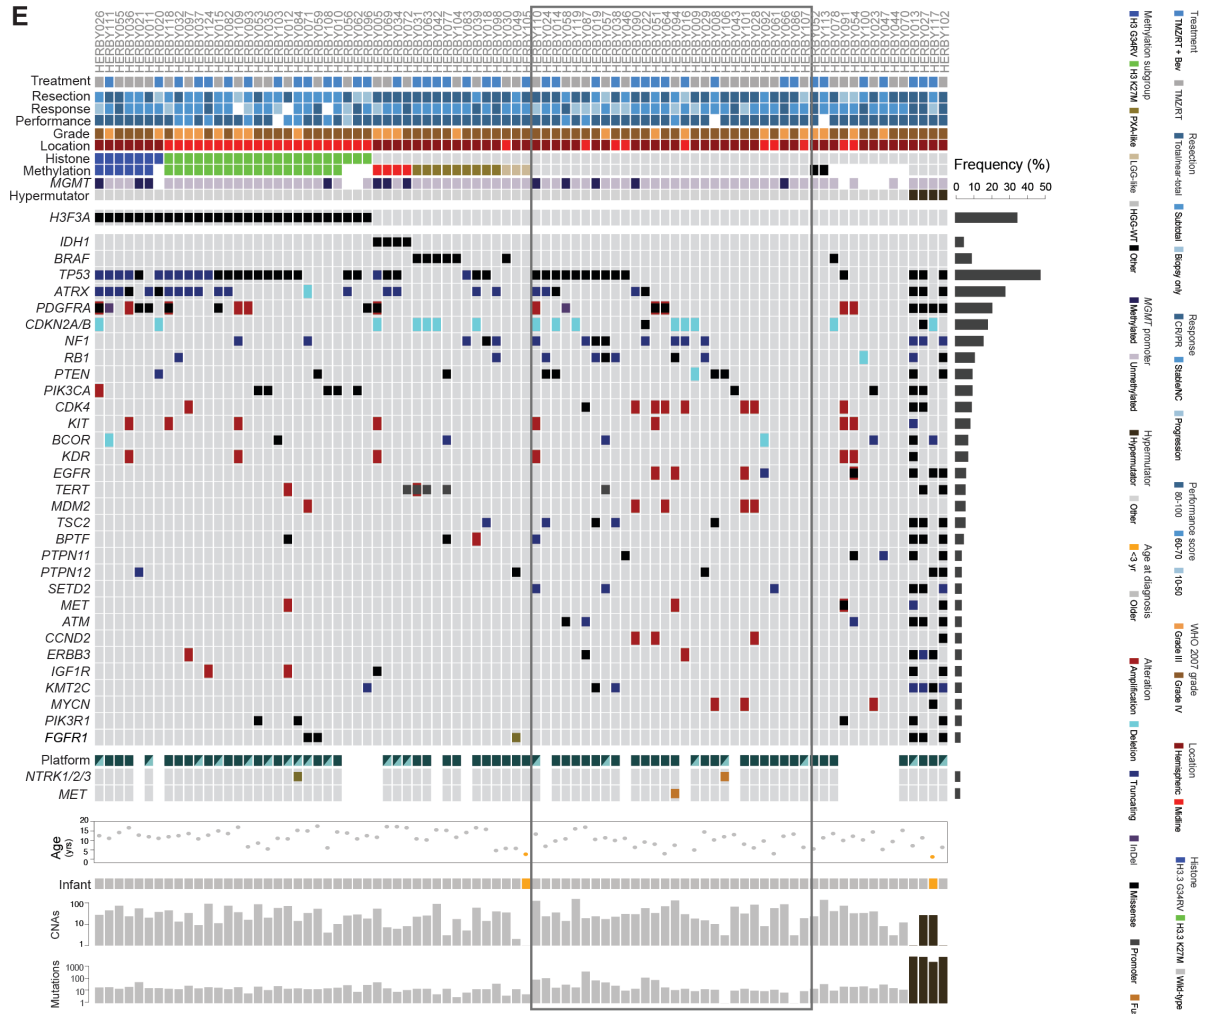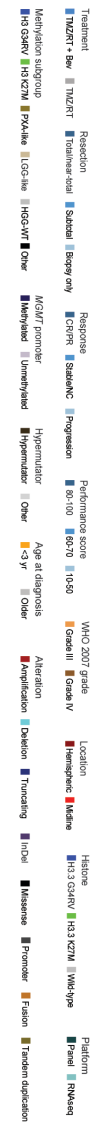

**Figure S3** (related to Figure 3) – *IDH1* mutant and *H3F3A/IDH1/BRAF* wild-type tumors. (A) Integrated annotation of somatic mutations and DNA copy number changes in 4 samples with *IDH1\_R132* mutation. Clinicopathological and molecular annotations are provided as bars according to the included key in Figure S1. (B) Haematoxylin and eosin staining of cases showing astrocytic (top, HERBY005) and oligodendroglial (bottom, HERBY072) histological features. Scale bar = 50  $\mu\text{m}$  (top) and 100  $\mu\text{m}$  (bottom). (C) Kaplan-Meier plot of event-free and overall survival of cases (y axis) separated by *IDH1\_R132* status, time given in months (x axis) and p value calculated by the log-rank test. (D) Radiological tumor lesion map of *IDH1* cases. Brighter colored pixels indicate a higher probability of tumor incidence. (E) Oncoprint representation of an integrated annotation of somatic mutations and DNA copy number changes for the 30 most frequently altered genes in 86 samples ( $n \geq 3$ , frequency barplot on the right, excluding hypermutator cases), ordered by histone and methylation subgroups. Selected common fusion events are also shown where available. Samples are arranged in columns with genes labelled along rows. Barplots are provided on a  $\log_{10}$  scale for numbers of copy number aberrations and somatic mutations per case. Clinicopathological and molecular annotations are provided as bars according to the included key. CR/PR = complete response or partial response; Stable/NC = stable disease or no change. The annotated box highlights *H3F3A/IDH1/BRAF* wild-type ‘HGG-WT’ tumors not otherwise assigned to a subgroup. (F) Radiological tumor lesion map of HGG-WT cases. Brighter colored pixels indicate a higher probability of tumor incidence.

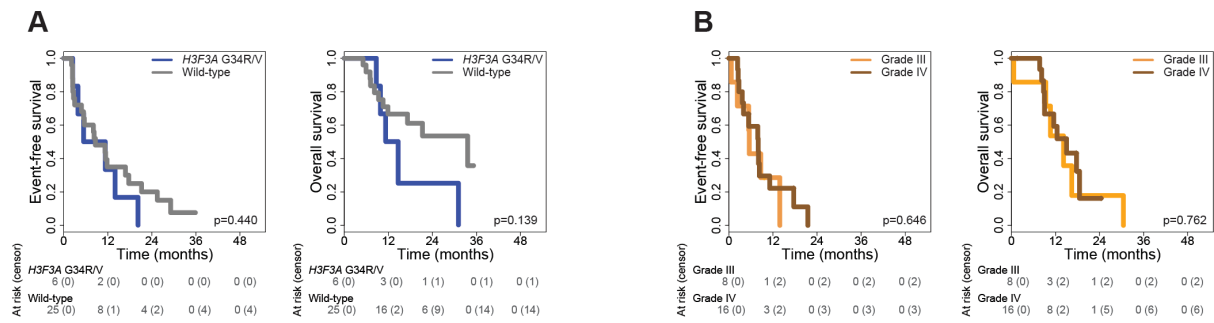

**Figure S4** (related to Figure 4) – *H3F3A* mutant subgroups. (A) Kaplan-Meier plot of event-free and overall survival (y axis) of 31 cerebral hemispheric cases, excluding those classified by methylation profiling as IDH1, PXA-like or LGG-like, separated by *H3F3A* status. Time is given in months (x axis) and p value calculated by the log-rank test. (B) Kaplan-Meier plot of event-free and overall survival (y axis) of 24 midline *H3F3A\_K27M* cases, separated by WHO grade. Time is given in months (x axis) and p value calculated by the log-rank test.

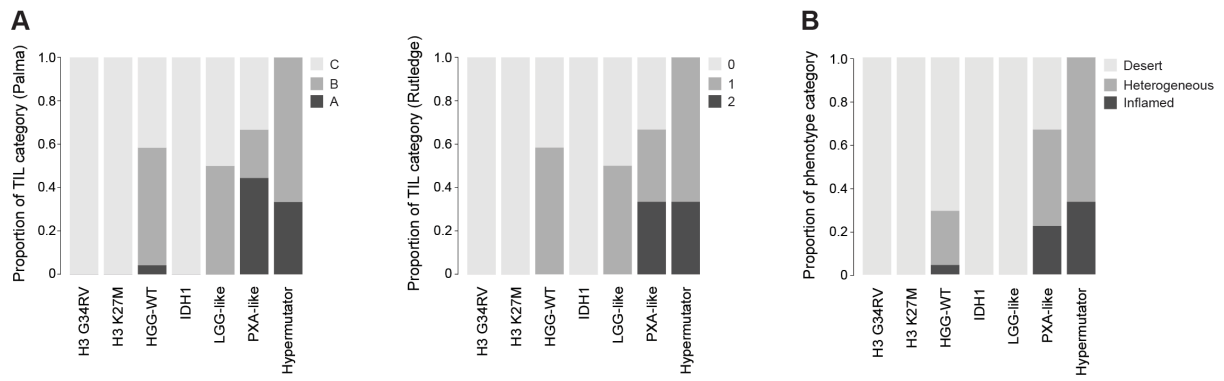

**Figure S5** (related to Figure 5) – Immune profiling. (A) Barplot showing relative proportions of tumor-infiltrating lymphocytes categorized according to two schema (Palma and Rutledge), of 72 cases split by pHGG subgroups. (B) Barplot showing relative proportions of histologically defined immune phenotype of 72 cases, split by pHGG subgroups.

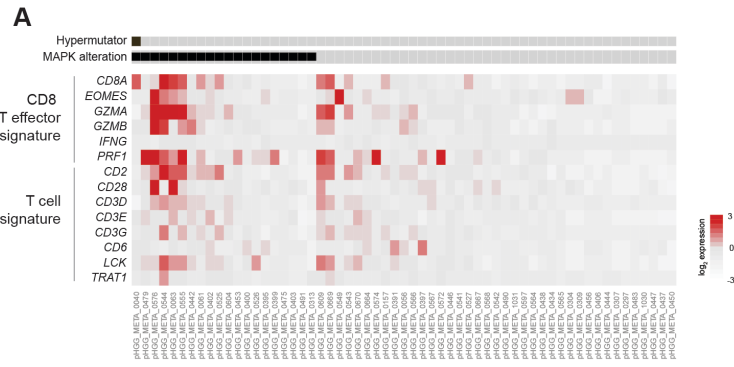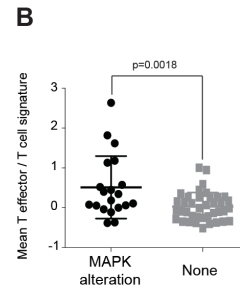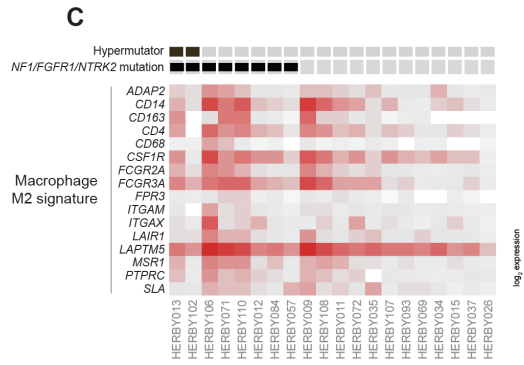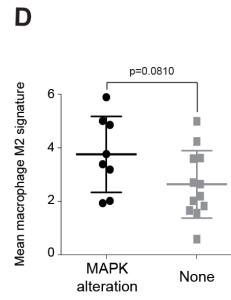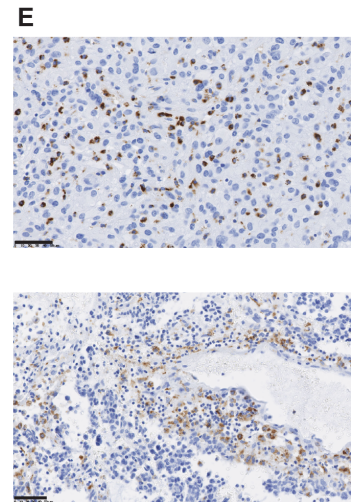

**Figure S6** (related to Figure 7) – CD8 and CD68 signatures. (A) Gene expression signatures for CD8 T effector and T cells plotted as a heatmap from combined gene expression data of non-brainstem high-grade glioma in n=59 patients aged 3-18 years from Mackay *et al.*, 2017. Hypermutator cases and those with MAPK alterations are annotated. (B) Boxplot of T effector / T cell gene expression values in MAPK altered samples compared to those without. Horizontal bar represents the mean, error bars the standard deviation. (C) Gene expression signatures for M2 macrophages plotted as a heatmap from 20 cases with RNAseq data. Hypermutator cases and those with MAPK alterations are annotated. (D) Boxplot of M2 macrophage cell gene expression values in MAPK altered samples compared to those without. Horizontal bar represents the mean, error bars the standard deviation. (E) Immunohistochemistry directed against CD68, showing positive cells in perivascular areas associated with lymphocytes (top, HERBY104, hypermutator) and more diffusely mixed with tumor cells (bottom, HERBY102, *BRAF\_V600E*). Scale bar = 50  $\mu$ m.

**A**

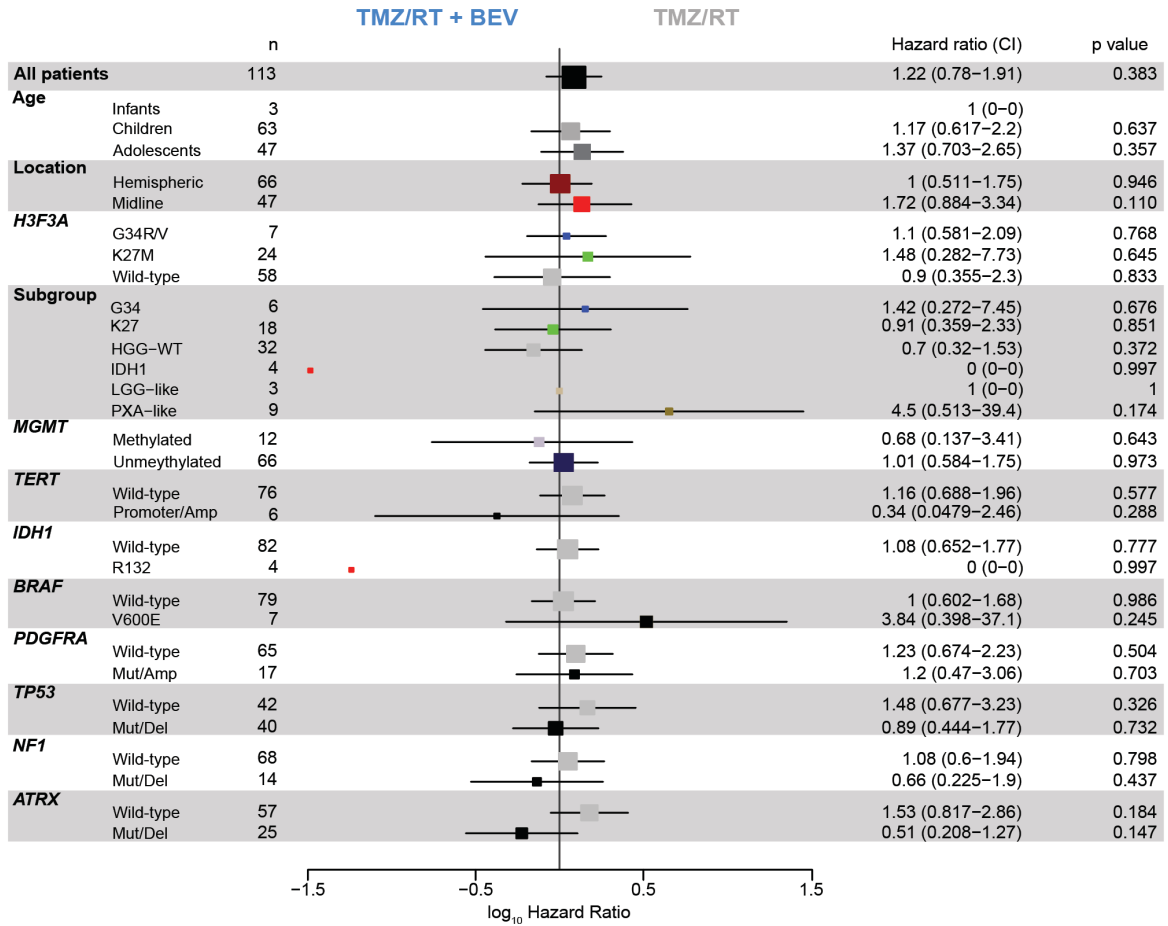

**B**

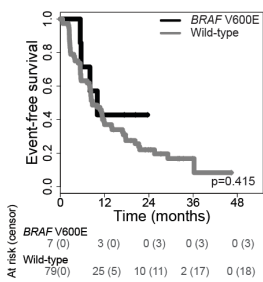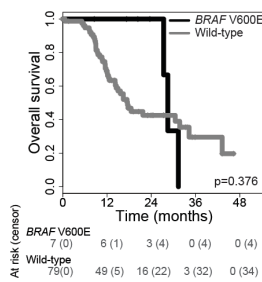

**C**

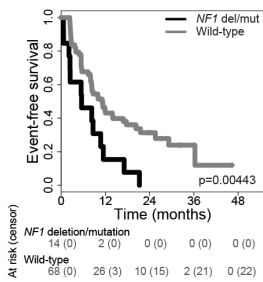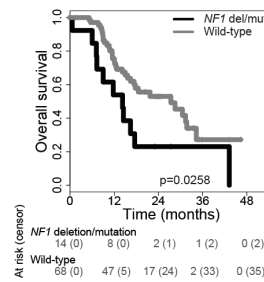

**D**

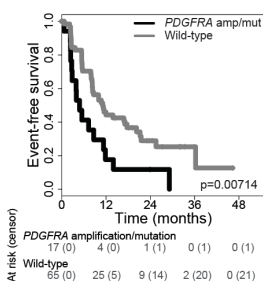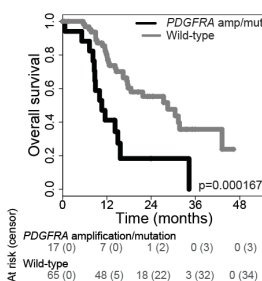

**E**

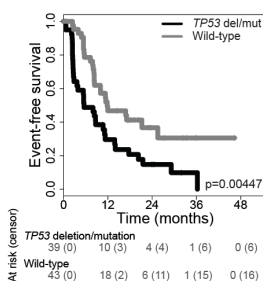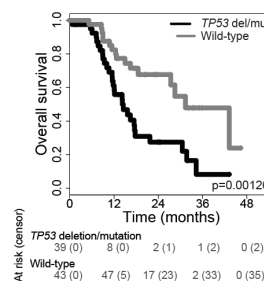

**Figure S7** (related to Figure 7) – Exploratory biomarker analysis. (A) Hazard ratio plot for a univariate Cox regression analysis on a variety of molecular subgroups and alterations in respect of event-free survival.  $\log_2$  hazard ratios less than zero indicate a better response to TMZ/RT plus BEV, ratios greater than zero a better response to TMZ/RT alone. Median (box) and 95% confidence intervals (whiskers) are plotted, with size of box proportion to sample size on an indicated category of tumors. (B-E) Kaplan-Meier plot of event-free and overall survival of cases (y axis) separated by *BRAF\_V600E* (B), *NF1* (C), *PDGFRA* (D) and *TP53* (E) status, time given in months (x axis) and p value calculated by the log-rank test.
